# Supplementary material for: Synthesis, Characterization, DFT and Photocatalytic Studies of a New Pyrazine Cadmium(II) Tetrakis(4-methoxy-phenyl)-porphyrin Compound
Source: MDPI journal article supplement (doi:10.3390/molecules27123833), 2022-06-14
Supplement: s1 [file s1]

## Supplementary Materials

**Table S1.** Crystallographic data of [Cd(TMPP)Pyz] (1).

|                                              |                                                                 |
|----------------------------------------------|-----------------------------------------------------------------|
| Formula                                      | C <sub>52</sub> H <sub>40</sub> CdN <sub>6</sub> O <sub>4</sub> |
| Formula weight                               | 925.30                                                          |
| Temperature (K)                              | 150                                                             |
| Space group                                  | P21/c                                                           |
| Crystal system                               | monoclinic                                                      |
| a/ Å                                         | 23.0965(10)                                                     |
| b/ Å                                         | 17.6690(7)                                                      |
| c/ Å                                         | 12.4340(5)                                                      |
| $\alpha$ /(deg)                              | 90                                                              |
| $\beta$ /(deg)                               | 99.551(2)                                                       |
| $\gamma$ /(deg)                              | 90                                                              |
| Volume/Å <sup>3</sup>                        | 5003.9(4)                                                       |
| Z                                            | 4                                                               |
| Density (g/ cm <sup>3</sup> )                | 1.228                                                           |
| Crystal size (mm <sup>3</sup> )              | 0.360 × 0.290 × 0.250                                           |
| Absorption coefficient (mm <sup>-1</sup> )   | 0.484                                                           |
| F(000)                                       | 1896.0                                                          |
| Reflections collected                        | 37209                                                           |
| Independent reflections                      | 11304[R(int) = 0.0284]                                          |
| Data/restraints/parameters                   | 11304/0/572                                                     |
| Index ranges (h. k. l)                       | -28. 29; -22. 22; -13. 16                                       |
| Theta range for data collection $\theta$ (°) | 5.836 to 54.92°                                                 |
| S [Goodness of fit]                          | 1.030                                                           |
| R1 a[Fo>4 $\sigma$ (Fo)]                     | 0.0355                                                          |
| wR2b ([all data])                            | 0.0879                                                          |
| Largest diff. peak/hole / e Å <sup>-3</sup>  | 0.60/-0.59                                                      |
| CCDC                                         | 2069722                                                         |

a:  $R1 = \sum ||Fo| - |Fc|| / \sum |Fo|$ . b:  $wR2 = \{ \sum [w(|Fo|^2 - |Fc|^2)^2] / \sum [w(|Fo|^2)] \}^{1/2}$ .

**Table S2.** Selected bond lengths (Å) and dihedral angles (°) for [Cd(TMPP)(Pyz)] (1).

| Cadmium coordination polyhedron |              |             |
|---------------------------------|--------------|-------------|
| Bond lengths (Å)                | Experimental | Theoretical |
| Cd-N1                           | 2.1742(18)   | 2.22        |
| Cd-N2                           | 2.1813(17)   | 2.23        |
| Cd-N3                           | 2.1949(17)   | 2.23        |
| Cd-N4                           | 2.2010(17)   | 2.22        |
| Cd-N5                           | 2.3696(19)   | 2.46        |
| Angles (°)                      | Experimental | Theoretical |

|                         |              |             |
|-------------------------|--------------|-------------|
| N1-Cd-N2                | 86.61(6)     | 85.56       |
| N1-Cd-N3                | 149.41(7)    | 143.91      |
| N1-Cd-N4                | 86.37(6)     | 84.78       |
| N1-Cd-N5                | 115.70(7)    | 124.60      |
| N2-Cd-N3                | 86.22(6)     | 84.06       |
| Pyrazine (axial ligand) |              |             |
| Bond lengths (Å)        | Experimental | Theoretical |
| N5-C62                  | 1.338(3)     | 1.34        |
| N5-C66                  | 1.332(3)     | 1.34        |
| C62-C63                 | 1.372(4)     | 1.39        |
| N6-C63                  | 1.336(4)     | 1.34        |
| N6-C65                  | 1.323(4)     | 1.34        |
| Angles (°)              | Experimental | Theoretical |
| N5-C66-C65              | 121.4(2)     | 122.08      |
| N5-C62-C63              | 121.6(2)     | 122.09      |
| C62-N5-C66              | 116.3(2)     | 115.83      |
| C63-N6-C65              | 115.5(2)     | 115.83      |
| N6-C63-C62              | 122.4(3)     | 122.08      |
| N6-C65-C66              | 122.9(3)     | 122.09      |

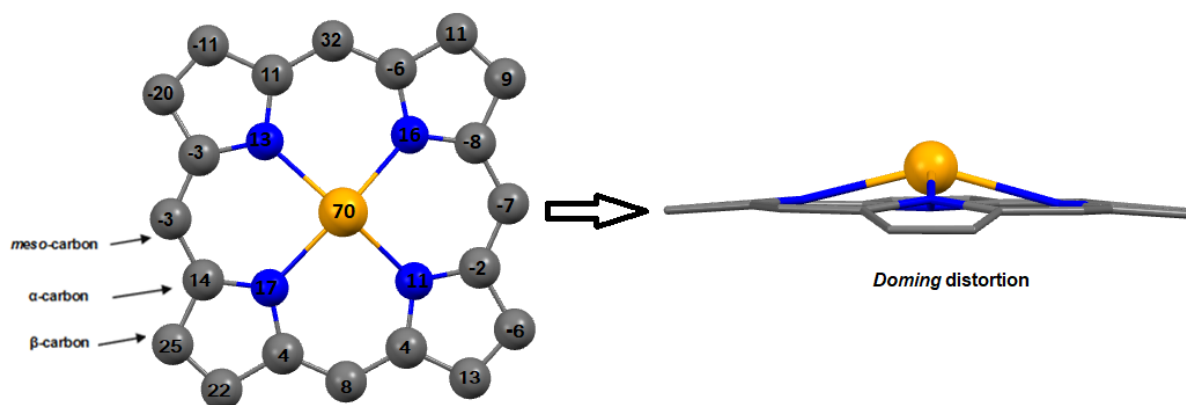

**Figure S1.** Formal diagrams of the porphyrinato core showing the out-of-plane localization of Cd(II) metal ion in [Cd(TMPP)(Pyz)] (1).

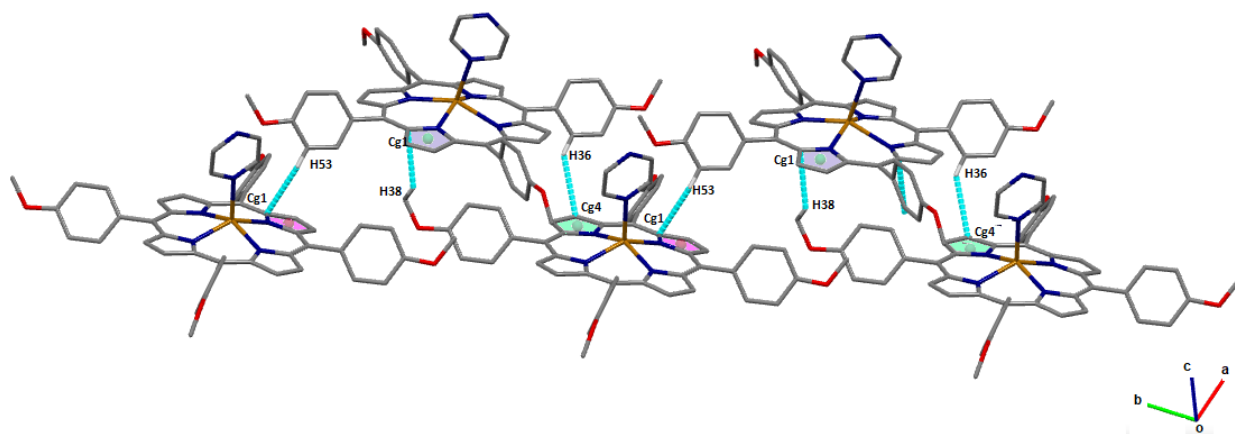

**Figure S2.** Schematic representation showing the C-H...Cg intermolecular interactions contacts are shown as dashed lines.

**Table S3.** Selected intermolecular C-H...N and C-H... $\pi$  interactions for [Cd(TMPP)(Pyz)] (**1**).

| D-H...A a      | Symmetry of A      | D-H...A ( $\text{\AA}$ ) | D-H...A ( $^\circ$ ) |
|----------------|--------------------|--------------------------|----------------------|
| C48-H48...N6   | $1+x, -1+y, z$     | 2.676(2)                 | 148                  |
| C65-H65...N6   | $1-x, 1+y, z$      | 2.962(3)                 | 143                  |
| C38-H38...Cg1b | $X, 1/2-Y, -1/2+Z$ | 3.661(3)                 | 158                  |
| C53-H53...Cg4c | $X, 3/2-Y, 1/2+Z$  | 3.639(4)                 | 148                  |

<sup>a</sup>: D is the donor atom and A is the acceptor atom, b: Cg1 is a pyrrole centroid (*i.e.* C20-C19-C18-C1-N1), and c: Cg4 is a pyrrole centroid (*i.e.* C16-C15-C14-C13-N4).

**Table S4.** Total interaction energies for [Cd(TMPP)(Pyz)] (**1**) ( $\text{KJ.mol}^{-1}$ ) at the B3LYP/DGDZVP basis set

|  | N | Sym op              | R     | $E_{\text{ele}}$ | $E_{\text{pol}}$ | $E_{\text{dis}}$ | $E_{\text{rep}}$ | $E_{\text{tot}}$ |
|--|---|---------------------|-------|------------------|------------------|------------------|------------------|------------------|
|  | 2 | $x, y, z$           | 17.67 | 7.6              | -1.3             | -24.8            | 0.0              | -14.5            |
|  | 2 | $x, -y+1/2, z+1/2$  | 12.01 | -15.8            | -5.0             | -71.4            | 0.0              | -82.6            |
|  | 2 | $x, -y+1/2, z+1/2$  | 9.66  | -47.9            | -8.1             | -123.1           | 103.1            | -100.2           |
|  | 2 | $x, y, z$           | 12.43 | -2.3             | -0.9             | -12.0            | 0.0              | -13.6            |
|  | 2 | $-x, y+1/2, -z+1/2$ | 16.94 | -3.9             | -1.1             | -16.0            | 0.0              | -18.8            |
|  | 1 | $-x, -y, -z$        | 18.03 | -2.7             | -1.4             | -25.9            | 0.0              | -26.4            |

|  |   |                   |       |       |      |        |      |       |
|--|---|-------------------|-------|-------|------|--------|------|-------|
|  | 1 | -x, -y, -z        | 10.55 | -40.5 | -8.1 | -100.2 | 84.3 | -83.9 |
|  | 2 | -x, y+1/2, -z+1/2 | 16.59 | -2.6  | -1.3 | -24.7  | 0.0  | -25.2 |
|  | 2 | -x, y+1/2, -z+1/2 | 13.28 | -3.5  | -1.1 | -11.7  | 0.0  | -14.7 |
|  | 1 | -x, -y, -z        | 12.92 | -7.1  | -1.0 | -9.5   | 0.0  | -16.6 |

**Table S5.** Total interaction energies for H<sub>2</sub>-TMPP (KJ.mol<sup>-1</sup>) at the B3LYP/DGDZVP basis set.

|  | N | Sym op        | R (Å) | $E_{ele}$ | $E_{pol}$ | $E_{dis}$ | $E_{rep}$ | $E_{tot}$ |
|--|---|---------------|-------|-----------|-----------|-----------|-----------|-----------|
|  | 2 | -x, y, -z+1/2 | 9.83  | -20.8     | -3.6      | -62.4     | 47.7      | -49.5     |
|  | 4 | -x, y, -z+1/2 | 16.41 | -0.3      | -1.0      | -18.1     | 0.0       | -16.7     |
|  | 2 | x, y, z       | 17.07 | 0.8       | -0.2      | -4.9      | 0.0       | -3.6      |
|  | 2 | x, y, z       | 13.93 | -15.3     | -2.5      | -40.8     | 0.0       | -53.6     |
|  | 2 | -x, y, -z+1/2 | 8.68  | -56.7     | -8.5      | -130.1    | 176.7     | -70.4     |
|  | 2 | x, y, z       | 15.70 | -3.9      | -3.1      | -46.2     | 0.0       | -46.6     |

**Table S6.** Atomic percentage contribution to the distance between the surface and the internal and external nucleus to the surface for H<sub>2</sub>-TMPP and [Cd(TMPP)(Pyz)] (1).

| % Contribution       |     |     |     |     |     |                |     |     |     |     |     |
|----------------------|-----|-----|-----|-----|-----|----------------|-----|-----|-----|-----|-----|
| H <sub>2</sub> -TMPP |     |     |     |     |     |                |     |     |     |     |     |
| Inside-Outside       |     |     |     |     |     | Inside-Outside |     |     |     |     |     |
| C-H                  | C-N | C-O | O-H | N-H | N-O | H-C            | N-C | O-C | H-O | H-N | O-N |
| 12.8                 | 0   | 0.4 | 5.4 | 2.7 | 0   | 11.0           | 0   | 0.3 | 4.9 | 2.2 | 0   |
| % Contribution       |     |     |     |     |     |                |     |     |     |     |     |
| [Cd(TMPP)(Pyz)] (1)  |     |     |     |     |     |                |     |     |     |     |     |
| Inside-Outside       |     |     |     |     |     | Inside-Outside |     |     |     |     |     |
| C-H                  | C-N | C-O | N-O | N-H | O-H | H-C            | N-C | O-C | O-N | H-N | H-O |
| 13.6                 | 0   | 0.5 | 0.1 | 4.3 | 4.9 | 11.5           | 0   | 0.4 | 0.1 | 3.3 | 4.3 |

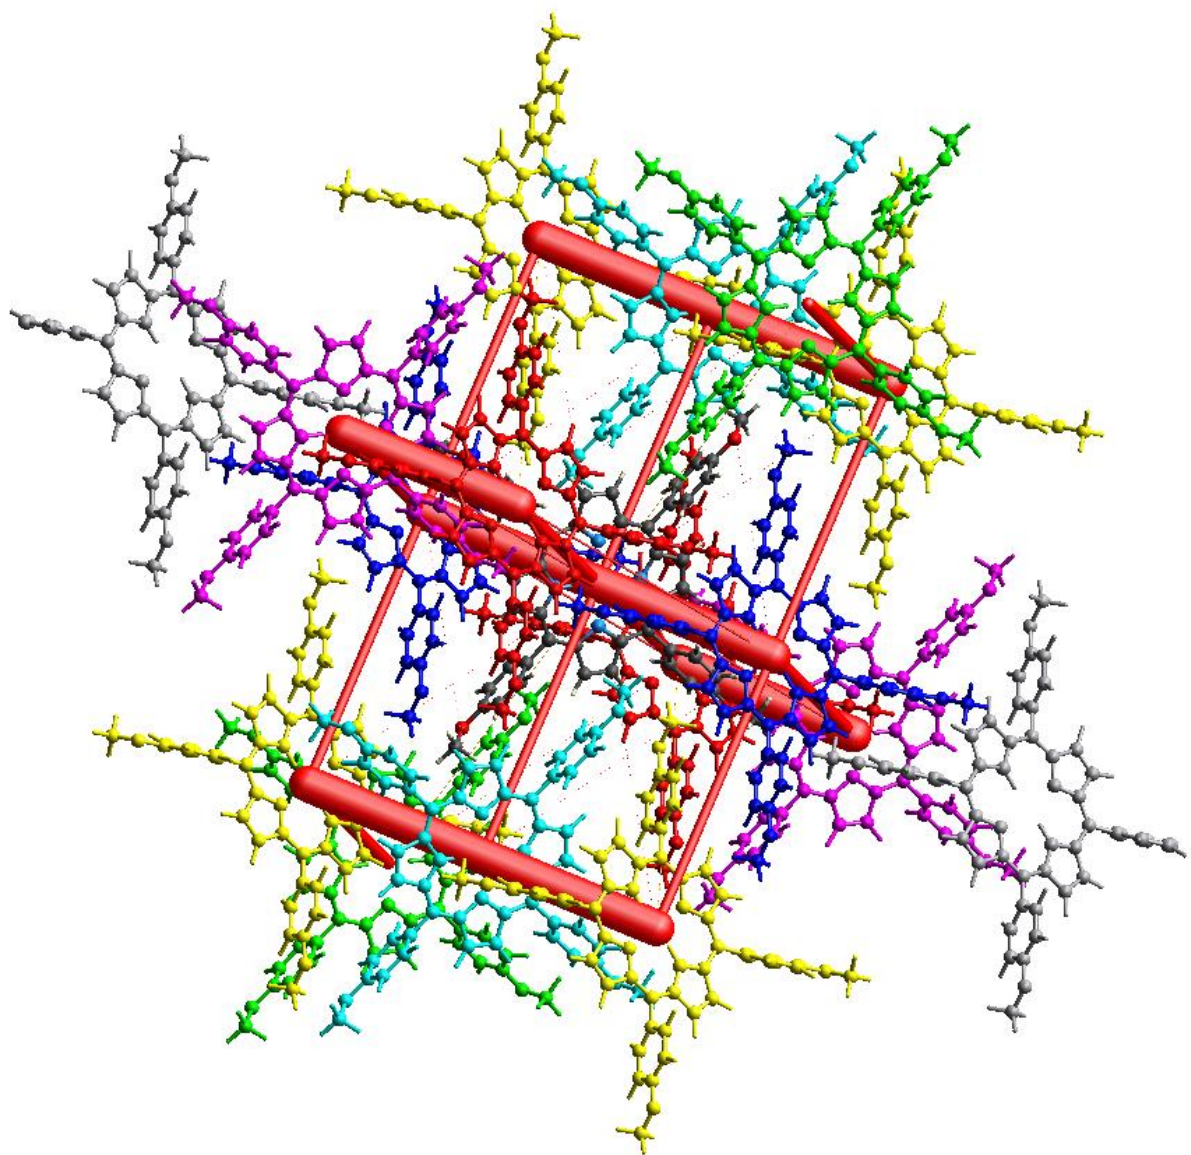

**Figure S3.** Coulombic interacting energies for interacting molecules in the H<sub>2</sub>-TMPP crystal.

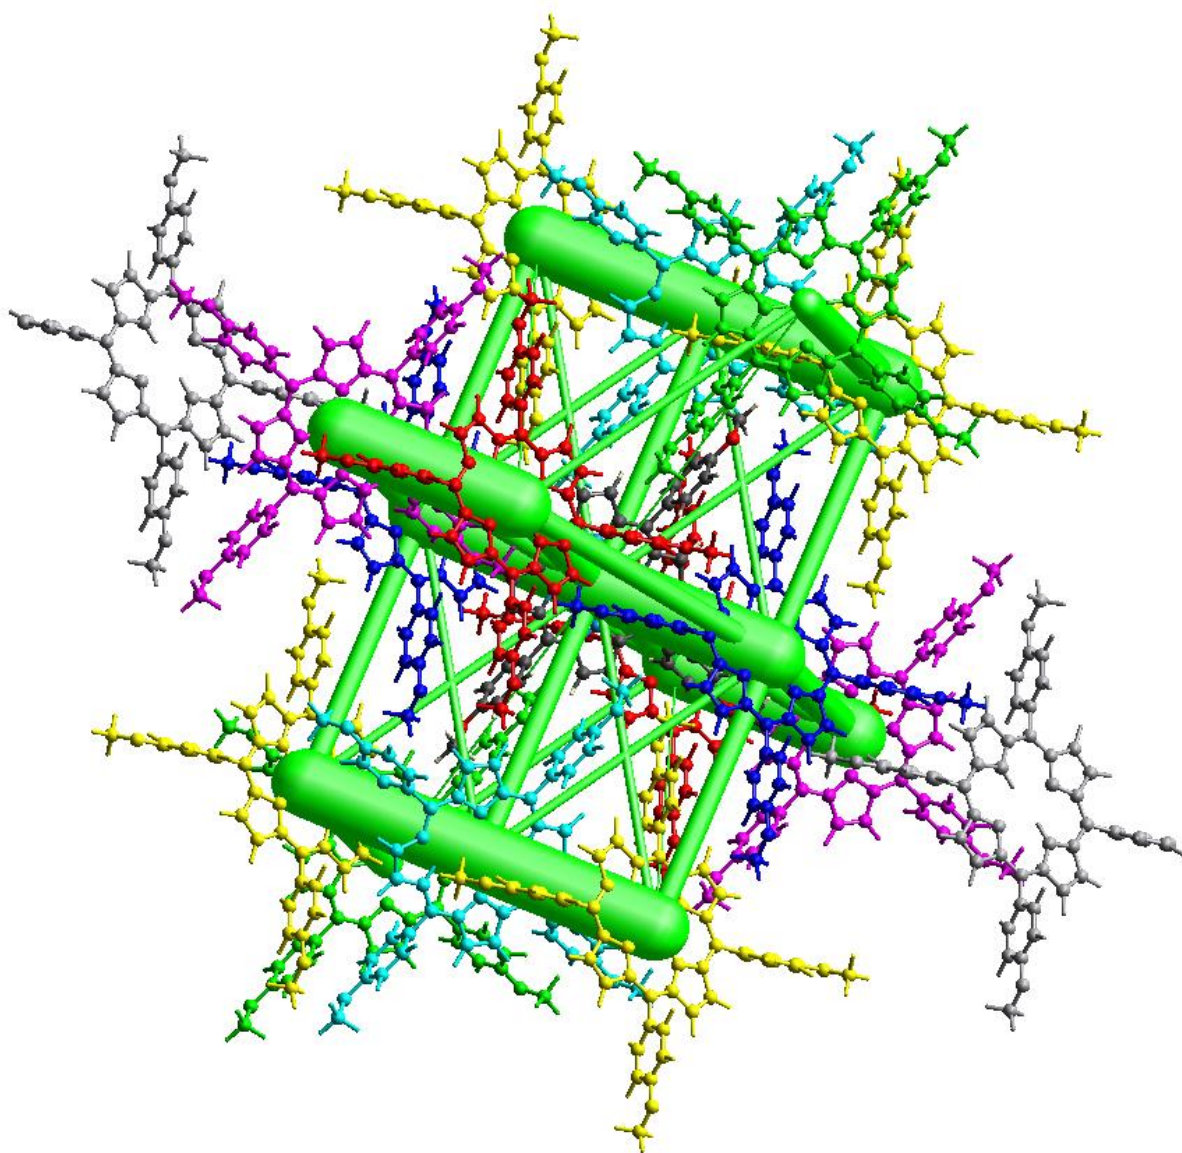

**Figure S4.** Dispersion interacting energies between molecules in the H<sub>2</sub>-TMPP crystal.



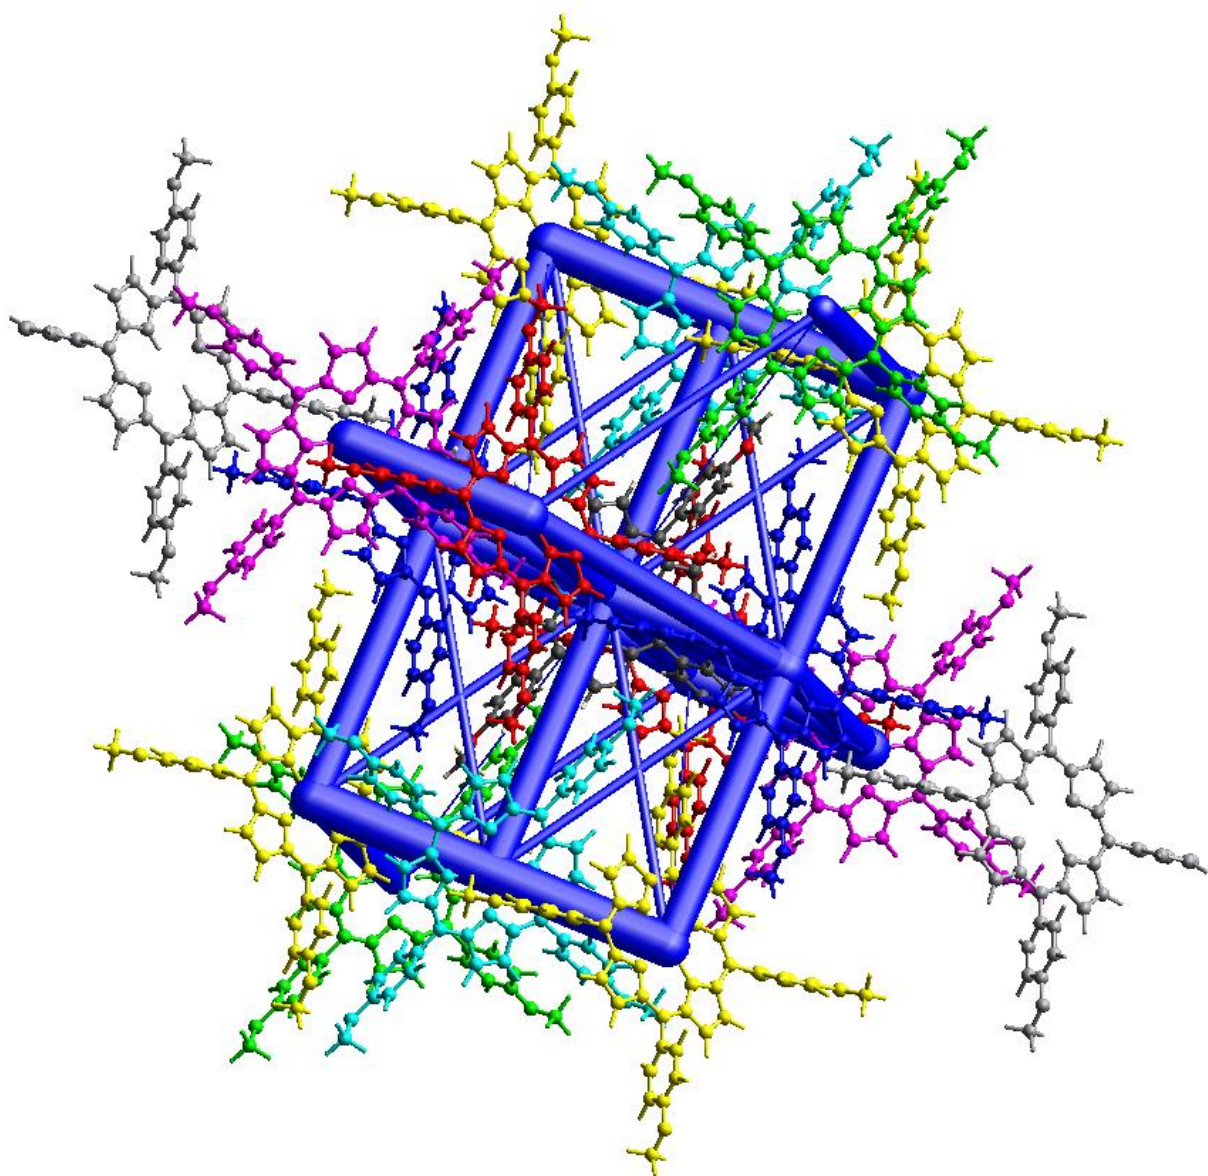

**Figure S5.** Total interacting energies between molecules in the H<sub>2</sub>-TMPP crystal.



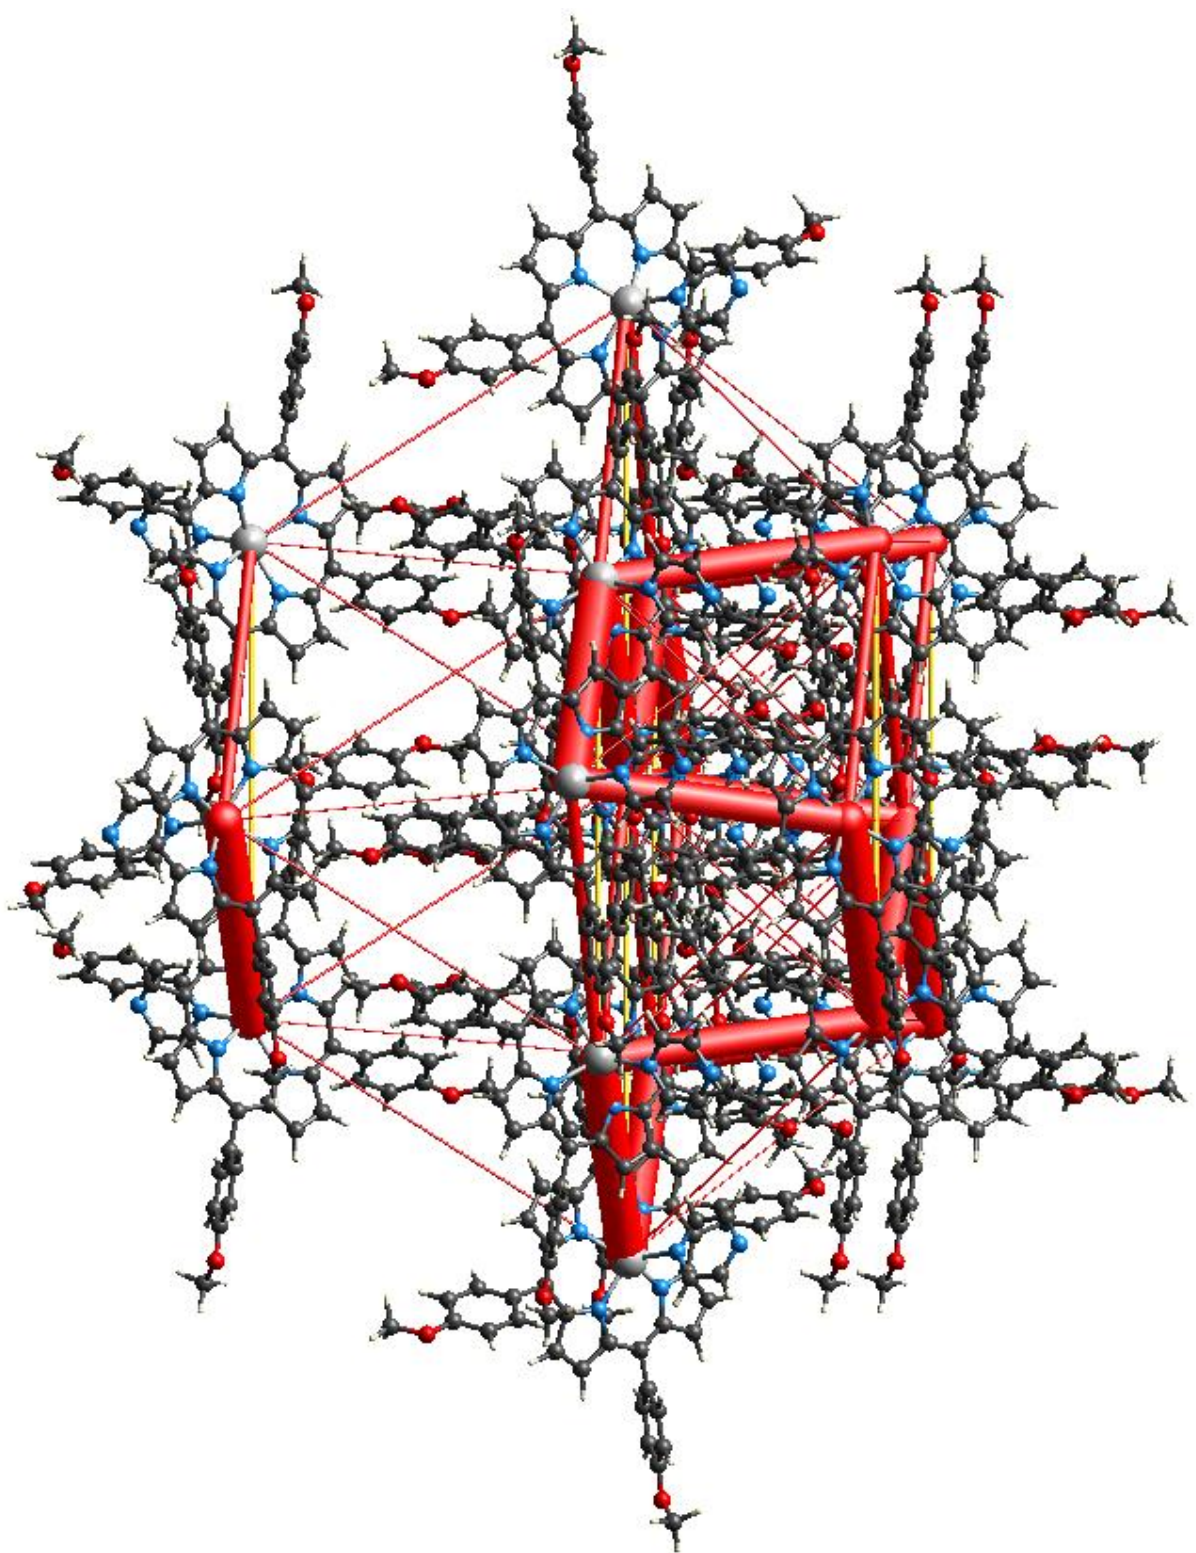

**Figure S6.** Coulomb interacting energies between molecules in the [Cd(TMPP)(Pyz)] crystal.

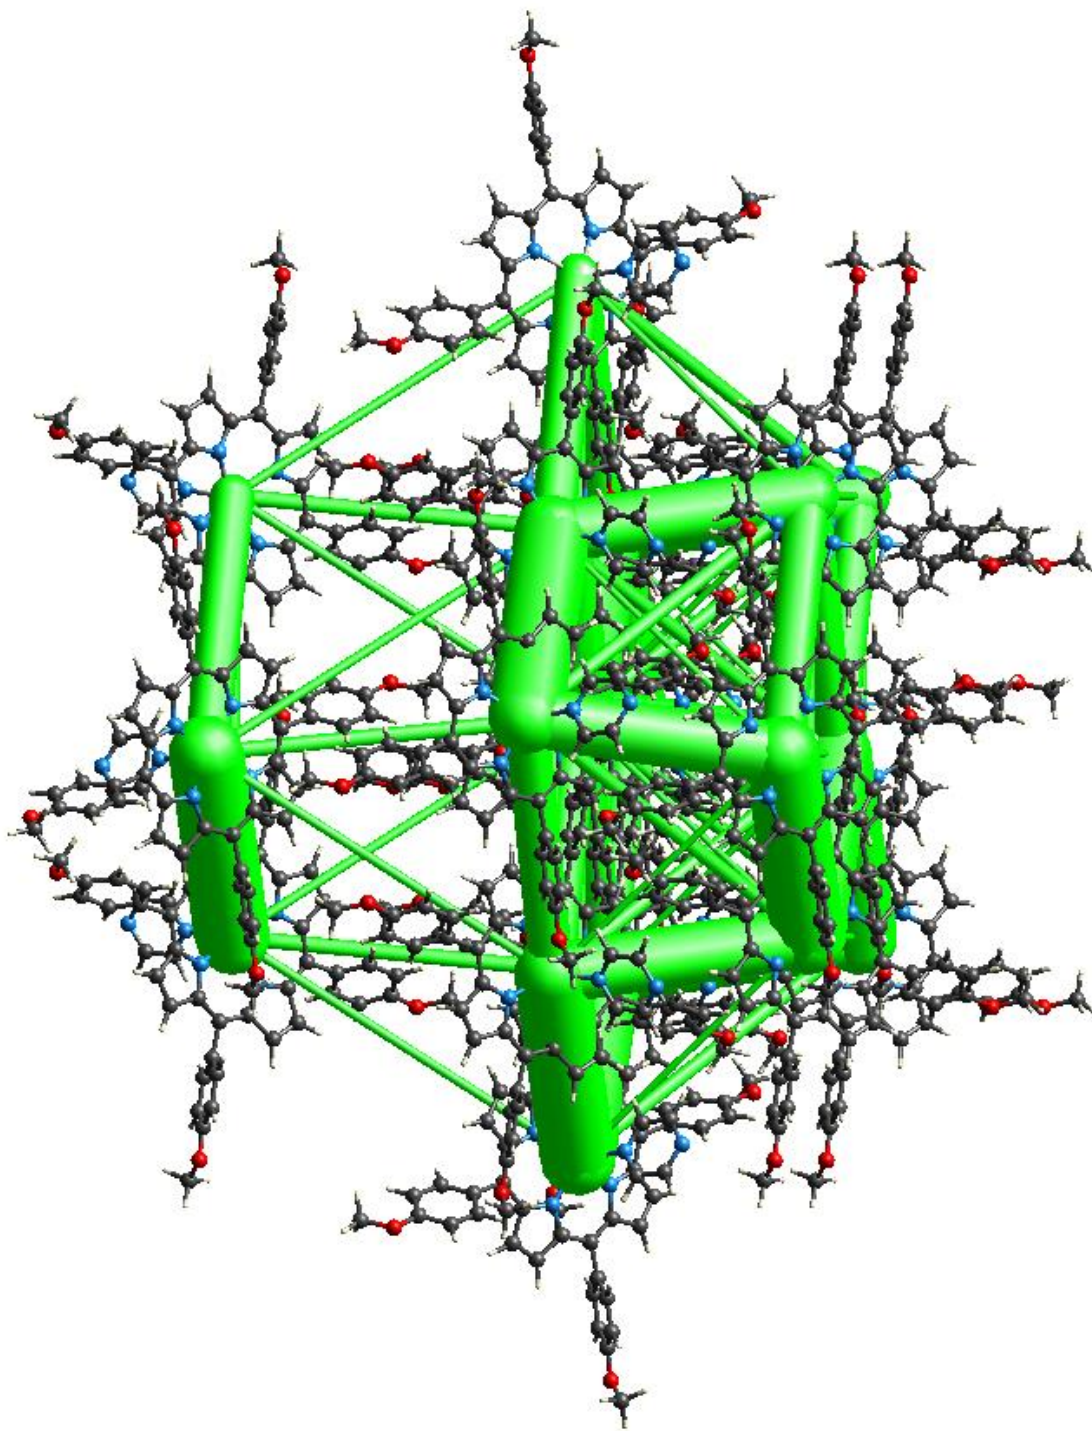

**Figure S7.** Dispersion interacting energies between molecules in the [Cd(TMPP)(Pyz)] crystal.



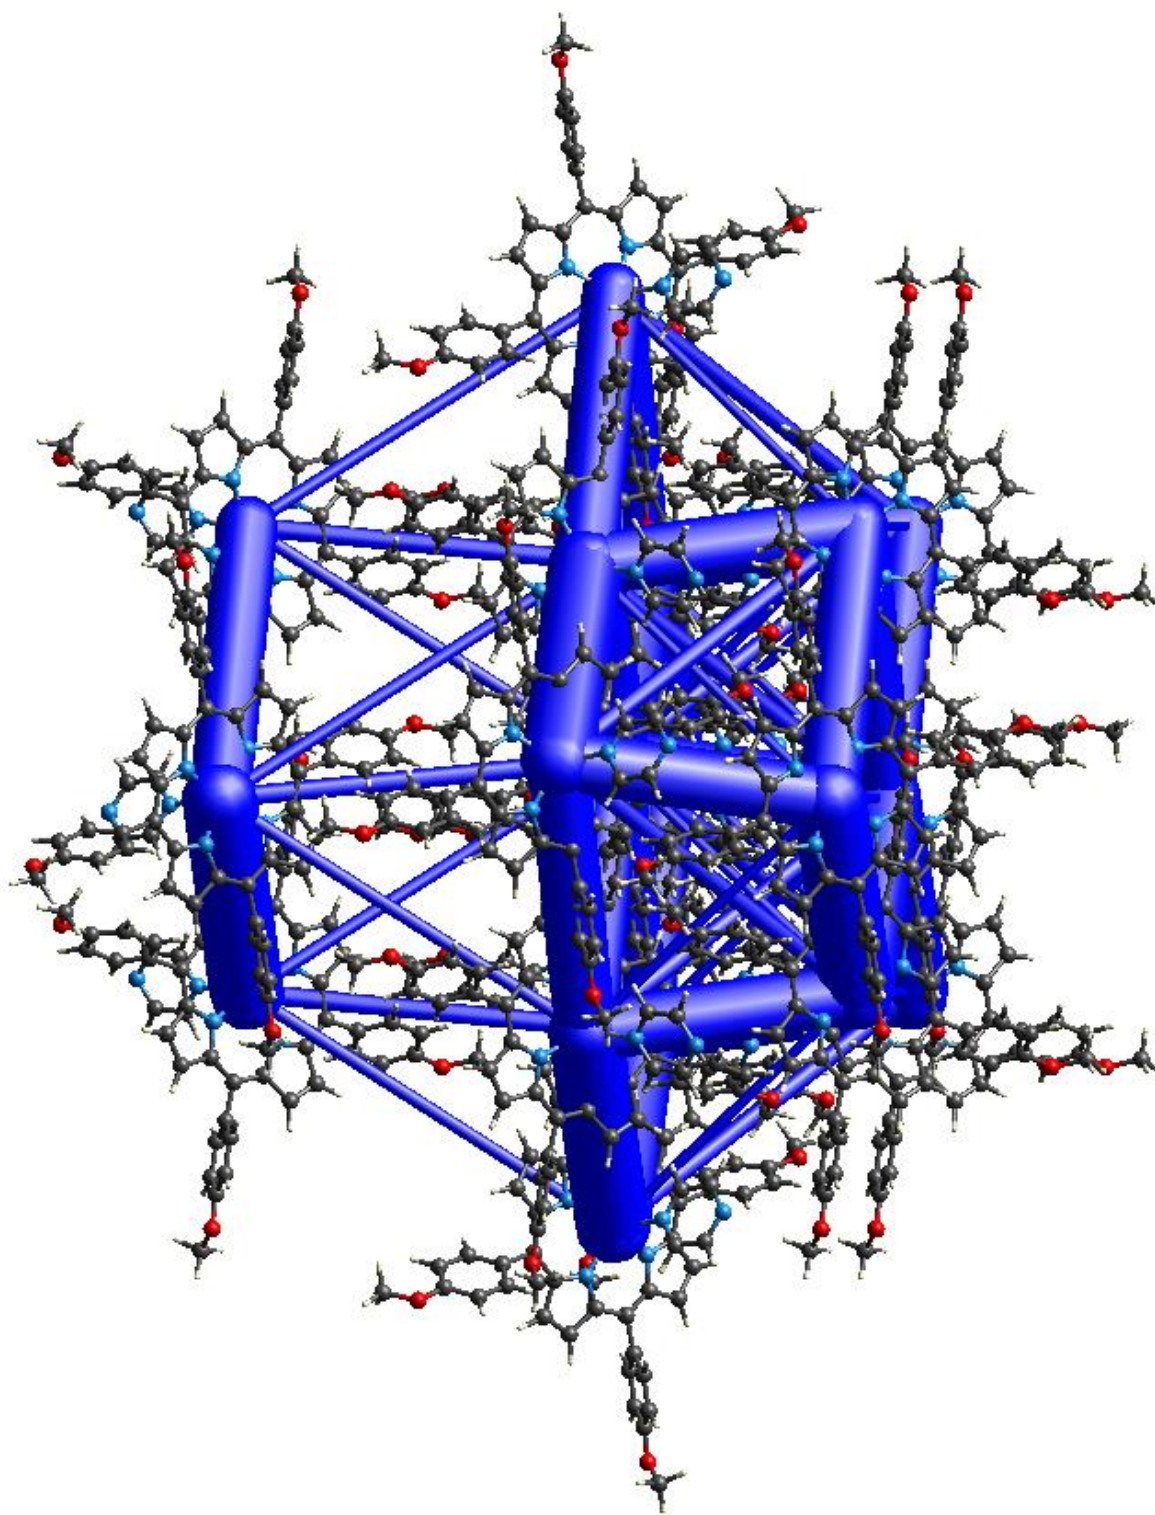

**Figure S8.** Total interacting energies between molecules in the [Cd(TMPP)(Pyz)] crystal.

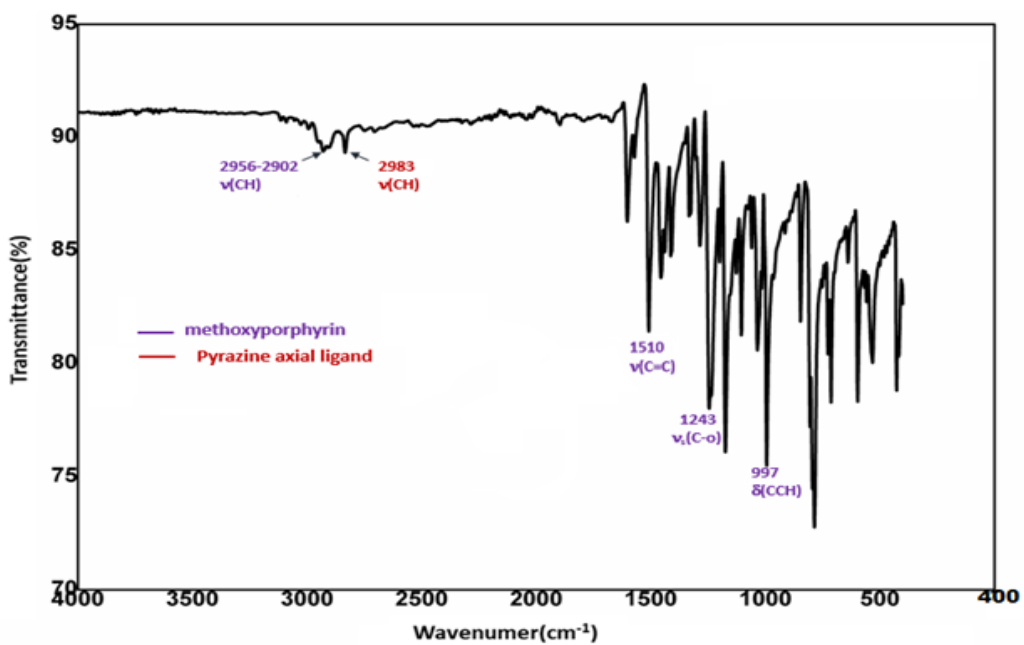

**Figure S9.** FTIR spectrum of solid [Cd(TMPP)(Pyz)] (**1**).

**Table S7.** Experimental and Theoretical IR assignments of the complex (**1**).

| [Cd (TMPP)(Pyz)] ( <b>1</b> )    |                                 |                      |
|----------------------------------|---------------------------------|----------------------|
| Experimental (cm <sup>-1</sup> ) | Theoretical (cm <sup>-1</sup> ) | Assignment           |
| 1243                             | 1290                            | (O-CH <sub>3</sub> ) |
| 1510                             | 1561                            | (C=C)                |
| 2833                             | 3203                            | (C-H)Pyz             |
| 2956-2902                        | 3215-3282                       | (C-H)proph           |
| 997                              | 1009                            | ((δ(CCH))porph       |

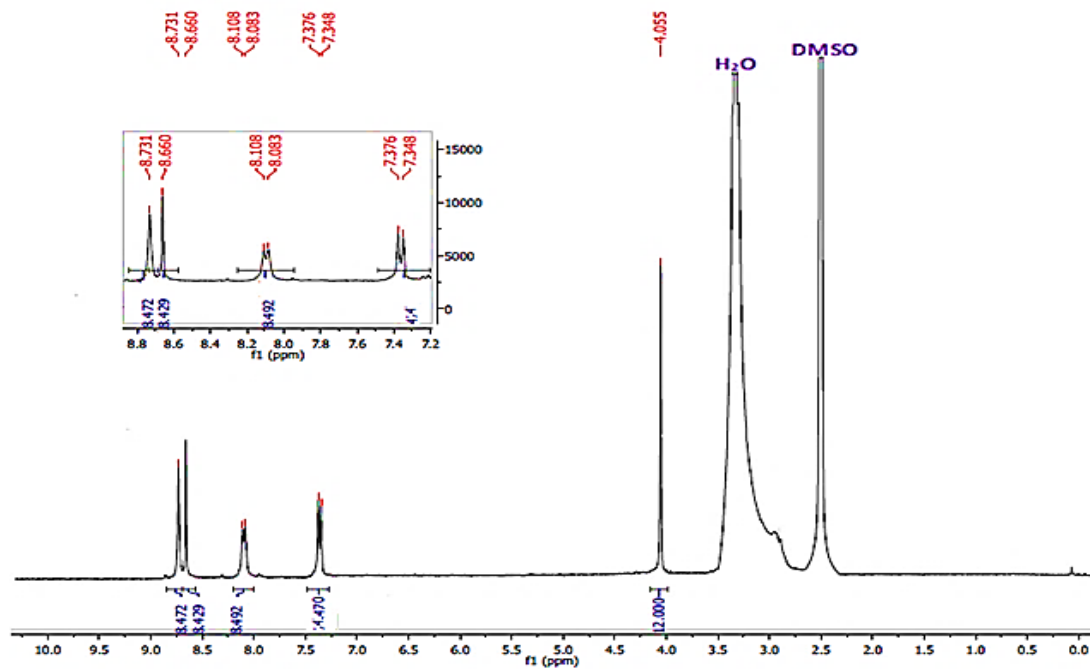

**Figure S10.**  $^1\text{H}$  NMR spectrum (300 MHz,  $\text{DMSO-d}_6$ , 298 K) of  $[\text{Cd}(\text{TMPP})(\text{Pyz})]$  (**1**).

**Table S8.**  $^1\text{H}$  NMR data ( $\delta$  in ppm) of the  $[\text{Cd}(\text{TMPP})(\text{Pyz})]$  complex in  $\text{DMSO-d}_6$ .

| H (ppm)           | Experimental | Theoretical |
|-------------------|--------------|-------------|
| H $\beta$ -pyr    | 8.73         | 8.1         |
| Ho-Ph/ Hm-Ph      | 8.10/ 8.08   | 6.1         |
| p- $\text{OCH}_3$ | 4.05         | 3.9         |
| H(Pyz ligand)     | 7.34         | 8.2-8.7     |

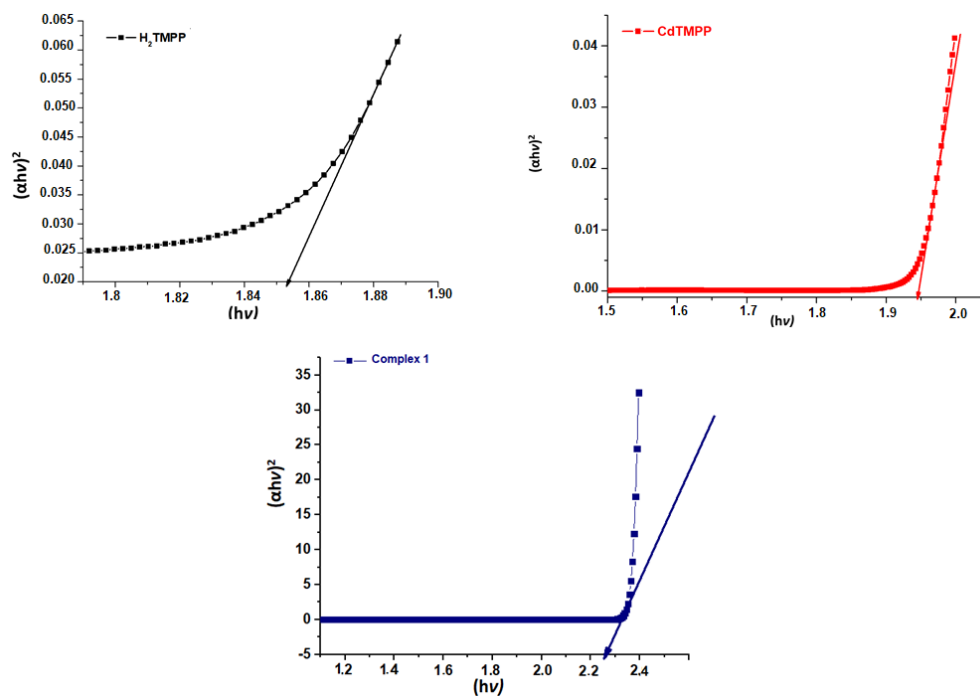

**Figure S11.** Plots of  $(\alpha h\nu)^2$  vs photon energy  $E$  of H<sub>2</sub>TMPP, CdTMPP and Complex 1.  $\alpha$  is the absorption coefficient.

**Table S9.** UV-Visible data of H<sub>2</sub>TMPP, [Cd(TMPP)], [Cd(TMPP)(Pyz)] and several [Cd(porph)(L)] porphyrin complexes .

| Compound                                      | Soret Band <sup>a,b</sup> | Q bands <sup>a,b</sup>                       | E <sub>g</sub><br>(eV) | Ref.      |
|-----------------------------------------------|---------------------------|----------------------------------------------|------------------------|-----------|
| H <sub>2</sub> -TMPP <sup>c</sup>             | 422 (463.2)               | 518 (14.13), 556 (9.7), 593 (4.3), 650 (4.8) | -                      | [61]      |
| [Cd(TMPP)] <sup>c</sup>                       | 436(367.7)                | 572(15.02), 616(15.87)                       | -                      | [61]      |
| H <sub>2</sub> -TMPP <sup>c</sup>             | 422(390.2)                | 518(14.10), 555(9.5), 594(3.9), 650(4.2)     | 1.85                   | This work |
| [Cd(TMPP)] <sup>c</sup>                       | 437(125)                  | 573(4.2), 617(2.4)                           | 1.95                   | This work |
| H <sub>2</sub> -TCIPP <sup>c</sup>            | 420 (309)                 | 517 (15.8), 553(9.2), 589 (5.6), 645 (4.1)   | 1.820                  | [36]      |
| [Cd(TCIPP)] <sup>c</sup>                      | 433 (117)                 | 568 (2.3), 609(2.6)                          | 1.960                  | [36]      |
| [Cd(T(p-Cl)4PP)(py)] <sup>c</sup>             | 429(301)                  | - -                                          | -                      | [62]      |
| [Cd(T(p-Cl)4PP)(DMF)] <sup>c</sup>            | 433(310)                  | 567(18), 609(14)                             | -                      | [62]      |
| [Cd(TPP)(2-NH <sub>2</sub> -py)] <sup>d</sup> | 433(310)                  | 567(18), 609(14)                             | -                      | [25]      |
| [Cd(TCIPP)(morph)] <sup>c</sup>               | 436(126)                  | 575(15.84), 620(3.6)                         | 1.903                  | [36]      |
| [Cd(TBPP)(2-MeHIm)] <sup>c</sup>              | 438 (109.65)              | 579 (14.65), 621 (3.5)                       | 1.920                  | [22]      |
| [Cd(TMPP)(Pyz)] <sup>c</sup>                  | 440(113)                  | 579(15.2) 623(3.2)                           | 2.23                   | This work |

<sup>a</sup>:  $\lambda_{\max}$  (nm), <sup>b</sup>:  $\log \epsilon$ . ( $\epsilon$ .  $10^{-3}$  L.cm<sup>-1</sup>.mol<sup>-1</sup>), <sup>c</sup>: in dichloromethane solvent, <sup>d</sup>: in chloroform solution.



**Table S10.** Photophysical data of our synthetic porphyrin species and a selection of Cd(porphyrin) complexes were recorded in CH<sub>2</sub>Cl<sub>2</sub>.

| Compound                           | Fluorescence a $\lambda_{\text{max}}$ (nm) |        | $\Phi_f^b$ | $\tau_f$ (ns) <sup>c</sup> | $\Phi\Delta$ <sup>d</sup> | Ref.      |
|------------------------------------|--------------------------------------------|--------|------------|----------------------------|---------------------------|-----------|
|                                    | Q(0,1)                                     | Q(0,0) |            |                            |                           |           |
| H <sub>2</sub> -TCIPP <sup>e</sup> | 653                                        | 678.8  | 0.063      | 8.2                        | 0.69                      | [63]      |
| H <sub>2</sub> -TCIPP              | 650                                        | 715    | 0.075      | 8.9                        | 0.49                      | [36]      |
| H <sub>2</sub> -TBPP               | 650                                        | 717    | 0.08       | 8.9                        | -                         | [22]      |
| H <sub>2</sub> -TMPP               | 656                                        | 722    | 0,084      | 7.8                        | 0.73                      | This work |
| [Cd(TPP)] <sup>f</sup>             | 620                                        | 655    | 0.065      | -                          | 0.69                      | [33]      |
| [Cd(TMPP)] <sup>g</sup>            | 622                                        | 667    | 0.018      | -                          | 0.73                      | [61]      |
| [Cd(TCIPP)]                        | 619                                        | 650    | 0.06       | 1.6                        | 0.41                      | [36]      |
| [Cd(TCIPP)(morph)]                 | 619                                        | 652    | 0.046      | 1.5                        | 0.53                      | [36]      |
| [Cd(TBPP)]                         | 614                                        | 650    | 0.01       | 1.6                        | -                         | [22]      |
| [Cd(TBPP)(2-MeIm)]                 | 612                                        | 657    | 0.02       | 1.7                        | -                         | [22]      |
| [Cd(TMPP)(DABCO)]                  | 625                                        | 652    | 0.01       | 1.2                        | -                         | [21]      |
| [Cd(TMPP)]                         | 618                                        | 652    | 0.06       | 1.8                        | 0.57                      | This work |
| [Cd(TMPP)(Pyz)](1)                 | 618                                        | 652    | 0.03       | 1.6                        | 0.13                      | This work |

<sup>a</sup>: Fluorescence spectra of porphyrins were obtained as a function of  $\lambda_{\text{ex}} = 437$  nm. <sup>b</sup>: Fluorescence quantum yield. <sup>c</sup>: Fluorescence lifetime (ns). <sup>d</sup>: Singlet oxygen production quantum yield. <sup>e</sup>: in toluene solvent, <sup>f</sup>: in EtOH solvent, <sup>g</sup>: in CH<sub>2</sub>Cl<sub>2</sub> solvent.

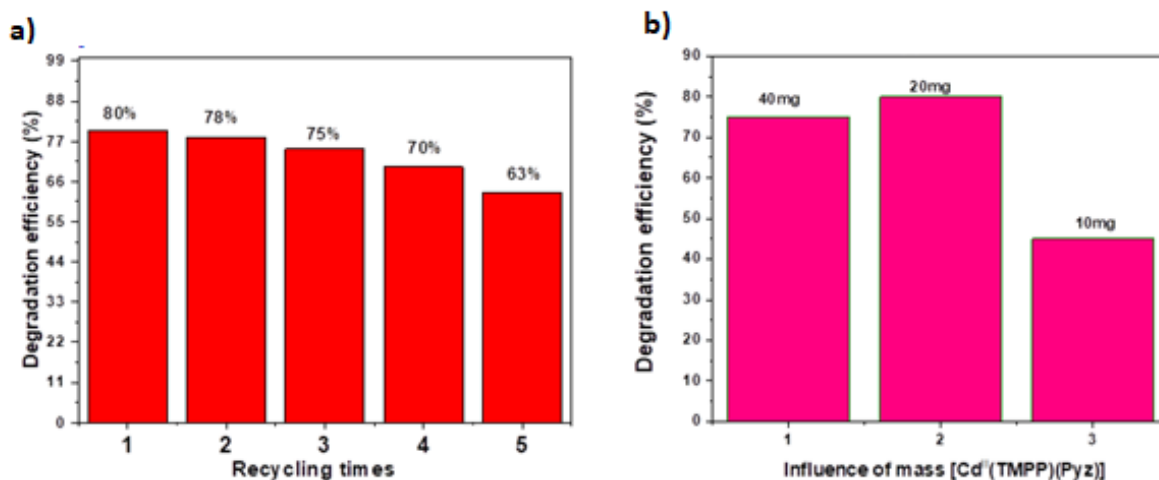

**Figure S12.** (a) Cycling experiments. (b) Influence of mass of [Cd<sup>II</sup>(TMPP)(Pyz)] (1).
